# Supplementary material for: Teachers personalize videos and animations of biochemical processes: results from a professional development workshop
Source: Royal Society of Chemistry journal article supplement (doi:10.1039/c9rp00057g), 2019-01-01
Supplement: c9rp00057g1.pdf [file c9rp00057g1.pdf]

### Appendix 1

Table A1.

Teachers TPACK-confidence questionnaire, and differences between pre- and post-workshop questionnaires, per question.

| Scales and items                                                                                                           | pre- vs. post-workshop questionnaires |
|----------------------------------------------------------------------------------------------------------------------------|---------------------------------------|
| <b>Technological Pedagogical Content Knowledge (TPACK)<sup>a</sup></b>                                                     |                                       |
| TPCK1. Find and use online animations that effectively demonstrate a specific scientific principle.                        | *                                     |
| TPCK2. Use digital technologies to facilitate scientific inquiry in the classroom.                                         | -                                     |
| TPCK3. Use digital technologies that facilitate topic-specific science activities in the classroom.                        | *                                     |
| TPCK4. Help students use digital technologies that extend their ability to observe scientific phenomenon.                  | **                                    |
| TPCK5. Help students use digital technologies that allow them to create and/or manipulate models of scientific phenomenon. | **                                    |
| <b>Technological Pedagogical Knowledge (TPK)<sup>a</sup></b>                                                               |                                       |
| TPK1. Use digital technologies to improve my teaching productivity.                                                        | -                                     |
| TPK2. Use digital technologies to improve communication with students.                                                     | *                                     |
| TPK3. Effectively manage a technology-rich classroom.                                                                      | **                                    |
| TPK4. Use digital technologies to motivate learners.                                                                       | -                                     |
| TPK5. Use digital technologies to improve the presentation of information to learners.                                     | *                                     |
| TPK6. Use digital technologies to actively engage students in learning.                                                    | **                                    |
| TPK7. Use digital technologies to help in assessing student learning.                                                      | *                                     |
| <b>Technological Knowledge (TK)<sup>b</sup></b>                                                                            |                                       |
| TK1. Searching Google                                                                                                      | -                                     |
| TK2. Searching YouTube                                                                                                     | -                                     |
| TK3. Downloading a video from YouTube                                                                                      | *                                     |
| TK4. Downloading and installing programs                                                                                   | -                                     |
| TK5. Searching for relevant programs on the Web                                                                            | -                                     |
| TK6. Working with a video editing program                                                                                  | *                                     |
| TK7. Adding effects to a video                                                                                             | *                                     |
| TK8. Adding music to a video                                                                                               | *                                     |
| TK9. Editing a video                                                                                                       | *                                     |
| TK10. Adding subtitles to a video                                                                                          | **                                    |
| TK11. Adding pictures to a video                                                                                           | **                                    |
| TK12. Connecting two videos                                                                                                | **                                    |
| TK13. Cutting a video                                                                                                      | **                                    |
| TK14. Converting files from one format to another (e.g., flv/mp to mpg/avi)                                                | -                                     |
| <b>Content knowledge (CK)<sup>c</sup></b>                                                                                  |                                       |
| CK1. The influence of the environment on gene expression.                                                                  | -                                     |
| CK2. Methylation processes and their influence on gene expression.                                                         | *                                     |
| CK3. The connection between methylation processes and the development of cancer.                                           | **                                    |
| CK4. Molecular processes leading to cancer.                                                                                | *                                     |

<sup>a</sup> Adapted from Graham et al. (2009): "Rate how confident you are in your current ability to complete each of the following tasks on the following scale: 1=Not confident at all, 2=slightly confident, 3=somewhat confident, 4=fairly confident, 5=quite confident, 6=completely confident.

<sup>b</sup> Adapted from Author et al. (2013): "Please grade your abilities on the following scale: I am afraid to use (grade = 0), I do not know (grade = 1), I know but I do not use (grade = 2), I know and I use (grade = 3)".

<sup>c</sup> Developed for this study.

The Wilcoxon Signed Rank test was applied to compare between pre and post results,

\*p < 0.05, \*\*p < 0.01, - p>0.05 not significant (N = 12).
